# Supplementary material
Source: MDPI journal article supplement (https://www.mdpi.com/2073-4352/13/9/1332)
Supplement: s1 [file s1]

|                    | atomic fraction   |                   |              |              |       | Comments     |
|--------------------|-------------------|-------------------|--------------|--------------|-------|--------------|
|                    | K(%)              | Fe(%)             | Ag(%)        | Te(%)        | O(%)  |              |
|                    | 11,82             | 5,85              | 7,46         | 23,89        | 50,98 | oxides       |
|                    | 28,74             | 0,79              | 0            | 10,56        | 59,91 |              |
|                    | 15,36             | 0                 | 11,55        | 12,54        | 60,56 |              |
|                    | 19,3              | 19,07             | 20,22        | 41,41        |       | flat surface |
|                    | 19,96             | 18,49             | 20,93        | 40,62        |       |              |
|                    | 20,19             | 18,31             | 20,01        | 41,49        |       |              |
|                    | 20,35             | 18,35             | 20,51        | 40,8         |       |              |
|                    | 20,63             | 17,22             | 21,25        | 40,89        |       |              |
|                    | 20,28             | 17,89             | 20,98        | 40,85        |       |              |
| mean               | <b>20,1183333</b> | <b>18,2216667</b> | <b>20,65</b> | <b>41,01</b> |       |              |
| standard deviation | 0,4563953         | 0,62117362        | 0,48195435   | 0,35400565   |       |              |
