# Supplementary material
Source: MDPI journal article supplement (https://www.mdpi.com/2073-4352/13/9/1332)
Supplement: s1 [file s1]

| sample    | atomic fraction    |                    |                    |                    | Comments                                          |
|-----------|--------------------|--------------------|--------------------|--------------------|---------------------------------------------------|
| crystal 1 | K (%)              | Fe (%)             | Ag (%)             | Se (%)             |                                                   |
|           | 20,42              | 17,4               | 21,01              | 41,17              |                                                   |
|           | 20,77              | 17,56              | 20,92              | 40,75              |                                                   |
|           | 20,27              | 17,21              | 20,32              | 42,2               |                                                   |
|           | 20,97              | 17,28              | 21,13              | 40,62              |                                                   |
|           | 21,54              | 17,2               | 19,81              | 41,45              |                                                   |
|           | 20                 | 17,44              | 20,21              | 42,27              |                                                   |
|           | 21,31              | 16,94              | 20,49              | 41,49              |                                                   |
|           | 21,02              | 17,36              | 20,12              | 41,5               |                                                   |
|           | 19,84              | 17,38              | 20,56              | 42,22              |                                                   |
|           | 20,87              | 17,44              | 20,35              | 41,34              |                                                   |
|           | 20,51              | 17,01              | 20,94              | 41,54              |                                                   |
|           | 21,1               | 17,16              | 20,41              | 41,33              |                                                   |
|           | 21,52              | 17,38              | 20,57              | 40,53              |                                                   |
|           | 20,57              | 16,74              | 20,26              | 42,43              |                                                   |
|           | 21,57              | 16,31              | 20,31              | 41,82              |                                                   |
|           | 19,99              | 16,62              | 21,29              | 42,19              |                                                   |
|           | 20,37              | 17,06              | 20,73              | 41,84              |                                                   |
|           | 21,14              | 17,15              | 20,41              | 41,31              |                                                   |
| mean      | <b>20,76555556</b> | <b>17,14666667</b> | <b>20,54666667</b> | <b>41,55555556</b> |                                                   |
|           |                    |                    |                    |                    |                                                   |
| crystal 2 | 20,4               | 17,5               | 20,59              | 41,52              | crystal used for resistance measurement (Fig. 6a) |
|           | 20,41              | 16,57              | 20,64              | 41,37              |                                                   |
|           | 20,44              | 17,42              | 20,55              | 41,58              |                                                   |
|           | 20,9               | 17,88              | 20,52              | 40,7               |                                                   |
|           | 20,93              | 17,52              | 20,79              | 40,77              |                                                   |
|           | 19,88              | 17,19              | 21,01              | 42                 |                                                   |
|           | 20,9               | 17,41              | 21,38              | 40,3               |                                                   |
| mean      | <b>20,55142857</b> | <b>17,35571429</b> | <b>20,78285714</b> | <b>41,16571429</b> |                                                   |
|           |                    |                    |                    |                    |                                                   |
| crystal 3 | 20,58              | 16,81              | 19,68              | 42,93              |                                                   |
|           | 20,51              | 16,87              | 19,87              | 42,76              |                                                   |
|           | 19,92              | 17,58              | 19,85              | 42,65              |                                                   |
|           | 19,97              | 16,83              | 18,56              | 44,64              |                                                   |
|           | 21,07              | 16,86              | 19,49              | 42,58              |                                                   |
|           |                    |                    |                    |                    |                                                   |
| crystal 4 | 20,45              | 16,95              | 20,43              | 42,17              |                                                   |
|           | 21,4               | 17,21              | 20,11              | 41,28              |                                                   |
|           | 20,96              | 16,25              | 20,73              | 42,82              |                                                   |

|                    |             |             |             |             |
|--------------------|-------------|-------------|-------------|-------------|
|                    | 20,4        | 17,28       | 20,29       | 42,02       |
|                    | 19,76       | 17,23       | 20,69       | 42,32       |
|                    | 20,31       | 17,71       | 19,8        | 42,8        |
| crystal 5          | 20,44       | 16,91       | 20,9        | 41,75       |
|                    | 21,01       | 17,04       | 20,3        | 41,64       |
|                    | 20,37       | 17,33       | 20,23       | 42,07       |
|                    | 21,29       | 16,88       | 19,98       | 41,84       |
|                    | 20,48       | 17,7        | 19,75       | 42,07       |
|                    | 21,41       | 16,97       | 20,61       | 41,01       |
|                    | 20,71       | 17,65       | 20,65       | 40,99       |
|                    | 21,33       | 17,22       | 20,66       | 40,79       |
| crystal 6          | 20,02       | 17,29       | 21,38       | 41,31       |
|                    | 20,48       | 17,98       | 21,63       | 39,91       |
|                    | 21,26       | 17,5        | 21,07       | 40,16       |
|                    | 20,85       | 18,01       | 20,56       | 40,58       |
|                    | 20,89       | 17,15       | 21,45       | 40,51       |
|                    | 20,77       | 17,44       | 21,04       | 40,75       |
| total mean         | 20,6856     | 17,2156     | 20,5006     | 41,6102     |
| standard deviation | 0,490685318 | 0,378752841 | 0,562913014 | 0,872501658 |
