# Supplementary material
Source: MDPI journal article supplement (https://www.mdpi.com/2073-4352/13/9/1332)
Supplement: s1 [file s1]

|                    | atomic fraction |                 |                 |                 | Comments      |
|--------------------|-----------------|-----------------|-----------------|-----------------|---------------|
|                    | K(%)            | Fe(%)           | Ag(%)           | Te(%)           |               |
|                    |                 |                 |                 |                 | brighter part |
|                    | 17,67           | 1,22            | 46,48           | 34,62           |               |
|                    | 18,02           | 0               | 47,1            | 34,87           |               |
|                    | 15,66           | 0               | 46,99           | 37,35           |               |
|                    | 15,89           | 0               | 47,16           | 36,95           |               |
|                    | 16,1            | 0               | 47,65           | 36,07           |               |
|                    | 18,07           | 0               | 46,54           | 35,39           |               |
|                    | 17,22           | 0               | 47,64           | 35,14           |               |
| mean               | <b>16,82667</b> | <b>0</b>        | <b>47,18</b>    | <b>35,96167</b> |               |
| standard deviation | <b>1,085461</b> | <b>0</b>        | <b>0,420714</b> | <b>1,010909</b> |               |
|                    |                 |                 |                 |                 | darker part   |
|                    | 20,49           | 17,27           | 22,29           | 39,95           |               |
|                    | 19,69           | 16,57           | 22,77           | 40,97           |               |
|                    | 20,28           | 16,81           | 21,91           | 41              |               |
|                    | 20,26           | 17,34           | 21,71           | 40,68           |               |
|                    | 20,18           | 13,59           | 24,81           | 41,42           |               |
| mean               | <b>20,18</b>    | <b>16,316</b>   | <b>22,698</b>   | <b>40,804</b>   |               |
| standard deviation | <b>0,296901</b> | <b>1,557106</b> | <b>1,247926</b> | <b>0,545463</b> |               |
