# Supplementary material
Source: MDPI journal article supplement (https://www.mdpi.com/2073-4352/13/9/1332)
Supplement: s1 [file s1]

| sample       | atomic fraction |                  |                  |                  | Comments                                          |
|--------------|-----------------|------------------|------------------|------------------|---------------------------------------------------|
|              | K (%)           | Fe (%)           | Ag (%)           | Te (%)           |                                                   |
| crystal 1    | 20,71           | 16,27            | 22,49            | 40,53            |                                                   |
|              | 20,39           | 17,14            | 21,64            | 40,83            |                                                   |
|              | 21,59           | 16,87            | 22,61            | 38,93            |                                                   |
|              | 21,23           | 16,81            | 21,82            | 40,14            |                                                   |
|              | 19,92           | 16,51            | 22,23            | 41,34            |                                                   |
|              | 20,6            | 17,65            | 21,61            | 40,14            |                                                   |
| mean         | <b>20,74</b>    | <b>16,875</b>    | <b>22,066667</b> | <b>40,318333</b> |                                                   |
| crystal 2    | 20,19           | 17,07            | 21,62            | 41,12            |                                                   |
|              | 20,91           | 17,43            | 20,99            | 40,67            |                                                   |
|              | 20,49           | 17,48            | 20,58            | 41,46            |                                                   |
|              | 19,34           | 16,95            | 20,45            | 43,25            |                                                   |
|              | 20,74           | 17,13            | 20,91            | 41,22            |                                                   |
| mean         | <b>20,334</b>   | <b>17,212</b>    | <b>20,91</b>     | <b>41,544</b>    |                                                   |
| crystal 3    | 20,96           | 16,62            | 22,26            | 40,15            | crystal used for resistance measurement (Fig. 5a) |
|              | 21,87           | 17,15            | 21,13            | 39,85            |                                                   |
|              | 21,24           | 16,86            | 21,85            | 40,04            |                                                   |
|              | 20,71           | 16,9             | 21,65            | 40,74            |                                                   |
|              | 20,78           | 16,35            | 21,82            | 41,05            |                                                   |
| mean         | <b>21,112</b>   | <b>16,776</b>    | <b>21,742</b>    | <b>40,366</b>    |                                                   |
| crystal 4    | 20,84           | 14,35            | 23,81            | 41               |                                                   |
|              | 22,07           | 14,5             | 24,46            | 38,97            |                                                   |
|              | 21,02           | 14,31            | 24,23            | 40,44            |                                                   |
|              | 20,78           | 13,67            | 25,78            | 39,76            |                                                   |
| crystal 5    | 22,82           | 15,92            | 21,22            | 40,04            |                                                   |
|              | 19,99           | 15,67            | 22,37            | 41,98            |                                                   |
|              | 20,36           | 15,33            | 22,93            | 41,38            |                                                   |
| <b>total</b> |                 |                  |                  |                  |                                                   |
|              | <b>20,85</b>    | <b>16,301739</b> | <b>22,193913</b> | <b>40,653478</b> |                                                   |
|              | 0,7484408       | 1,1368683        | 1,3157602        | 0,9498498        |                                                   |
